# Supplementary material for: The fabrication of N-doped carbon dots by methionine and their utility in sensing Cu2+ in real water
Source: Royal Society of Chemistry journal article supplement (doi:10.1039/d3ay00056g), 2023-01-01
Supplement: d3ay00056g1.pdf [file d3ay00056g1.pdf]

## ***Electronic Supplementary Information***

### **The fabrication of N doped carbon dots by methionine and their utility in sensing**

#### **Cu<sup>2+</sup> in real water**

Peng Sun<sup>1, a</sup>, Yu Zou<sup>1, a</sup>, Fang Zhang<sup>b, \*</sup>, Miaomiao Tian<sup>a</sup> and Fang Chai<sup>a, \*</sup>

a. Key Laboratory of Photochemical Biomaterials and Energy Storage Materials, Heilongjiang Province, Key Laboratory for Photonic and Electronic Bandgap Materials, Ministry of Education, College of Chemistry and Chemical Engineering, Harbin Normal University, Harbin, 150025, Heilongjiang Province, China.

b. Purple Mountain Laboratories, Mozhou East Road, Nanjing, Jiangsu Province, 211111, People's Republic of China.

Corresponding author:

fangchai@gmail.com.

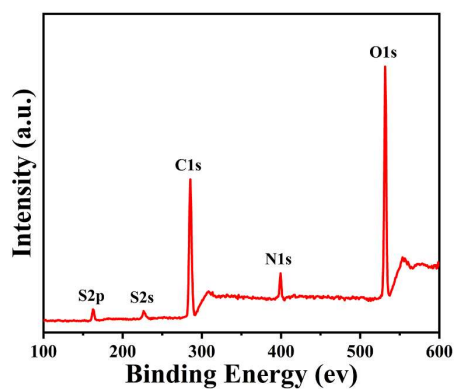

**Figure S1.** The XPS analysis of the Met-CDs (survey).

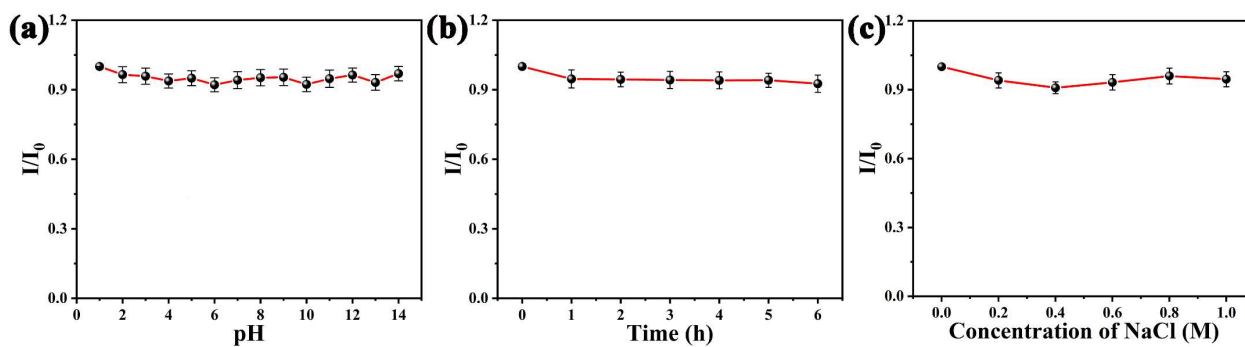

**Figure S2.** The Fluorescence spectra of Met-CDs under (a) different pH conditions, (b) different UV durations, and (c) different NaCl concentrations.
